# Supplementary material
Source: MDPI journal article supplement (https://www.mdpi.com/2227-9040/8/3/63)
Supplement: s1 [file s1]

*Supporting Information*

# **Electrochemical detection of H<sub>2</sub>O<sub>2</sub> released from prostate cancer cells using Pt nanoparticle-decorated rGO-CNT nanocomposite-modified screen-printed carbon electrodes**

**Seokyung Lee <sup>1</sup>, Young Ju Lee <sup>2</sup>, Jae Hyung Kim <sup>1</sup> and Gi-Ja Lee <sup>1,2,\*</sup>**

<sup>1</sup> Department of Medicine, Kyung Hee University Graduate School, Seoul 02447, Republic of Korea

<sup>2</sup> Department of Biomedical Engineering, College of Medicine, Kyung Hee University, Seoul 02447, Republic of Korea

\* To whom correspondence should be addressed. E-mail: gjlee@khu.ac.kr

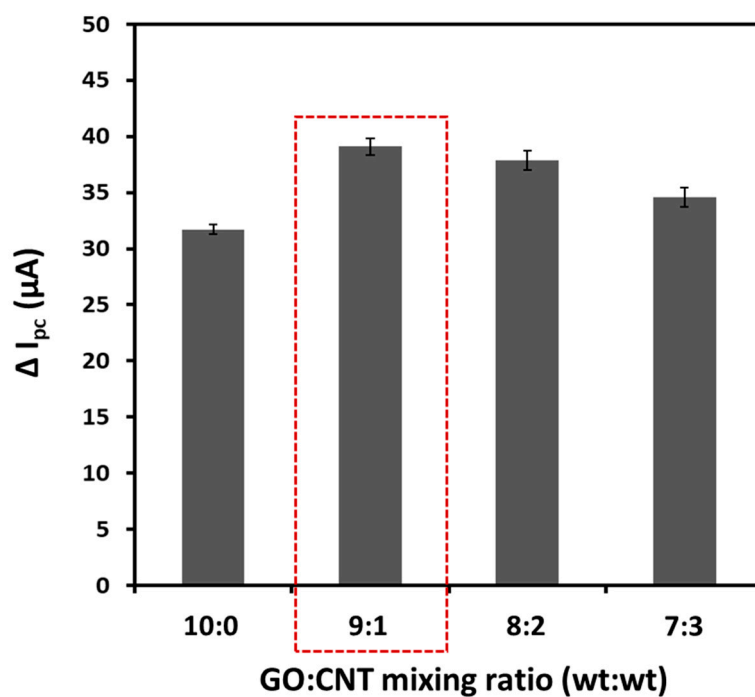

**Figure S1.** Changes in cathodic peak current ( $I_{pc}$ ) of CNT/rGO on GCE according to the mixing ratio between GO and CNT (wt/wt) in PBS solution (0.1 M, pH 7.4) containing 2.5 mM  $H_2O_2$  and 0.1 M KCl.

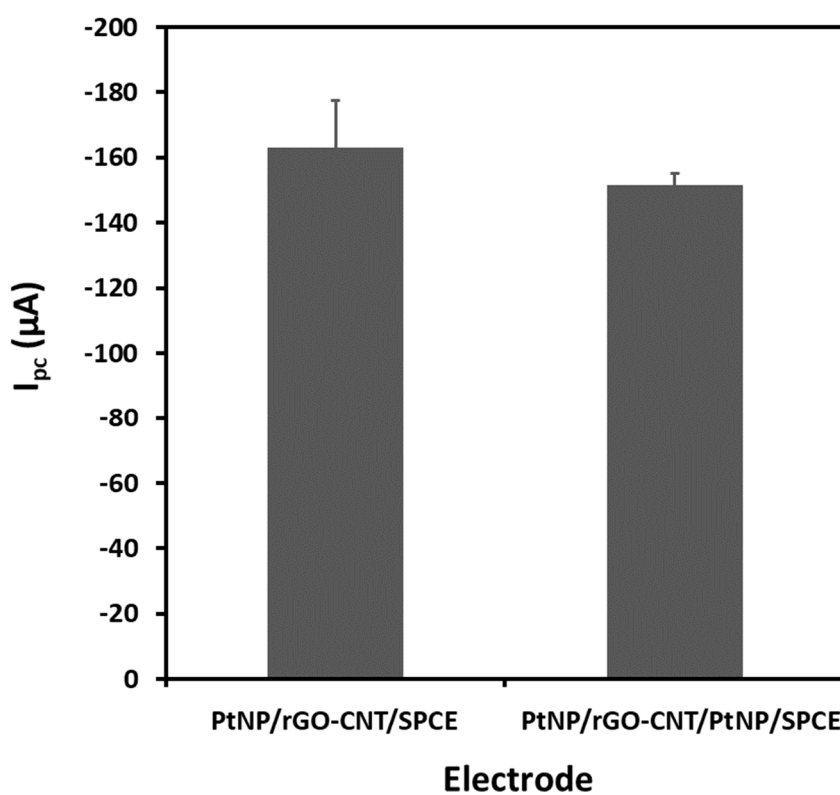

**Figure S2.** The cathodic peak current ( $I_{pc}$ ) of PtNP/rGO-CNT/SPCE and PtNP/rGO-CNT/PtNP electrodes ( $n=4$ , respectively) from the CV curves in  $N_2$ -saturated PBS solution (0.1 M, pH 7.4) containing 2.5 mM  $H_2O_2$  and 0.1 M KCl at a potential range from -0.7 to 0.3 V (Ag pseudo-reference electrode) and at a scan rate of 50 mV/sec.

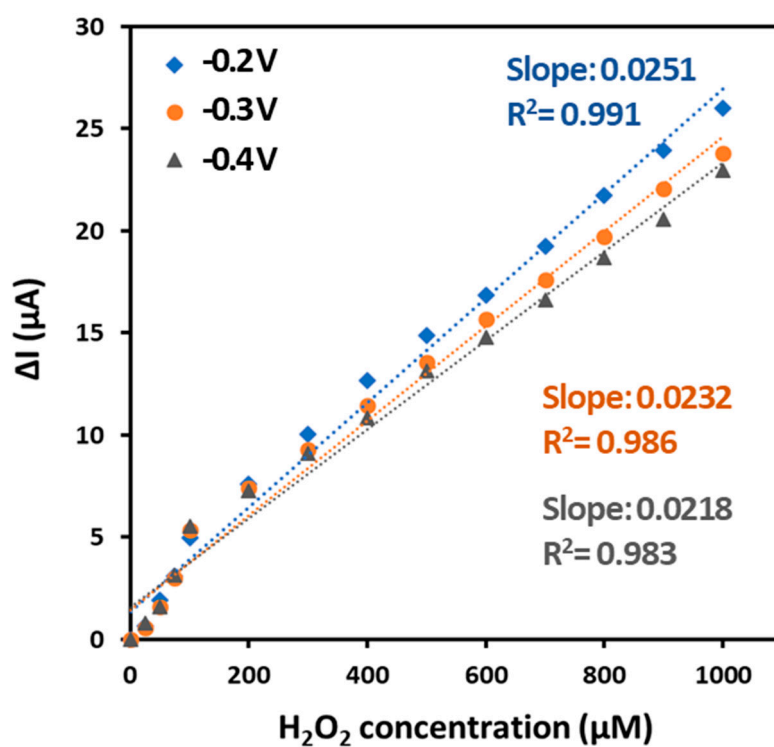

**Figure S3.** Effect of the applied potentials on the current response according to the H<sub>2</sub>O<sub>2</sub> concentration.
